# Supplementary material for: Prevalence and prescription patterns of oral glucocorticoids in adults: a retrospective cross-sectional and cohort analysis in France
Source: PubMed Central journal article supplement — BMJ Open. 2017 Jul 31;7(7):e015905. doi: 10.1136/bmjopen-2017-015905 (PMC5642779; doi:10.1136/bmjopen-2017-015905), 2017-07-31
Supplement: bmjopen-2017-015905supp001.pdf [file bmjopen-2017-015905supp001.pdf]

## Supplementary file

**Table S1.** List of glucocorticoids and corresponding identification codes

**Table S2.** List of concurrent drugs reimbursed at index date and corresponding identification codes

**Table S3.** List of comorbidities at risk for glucocorticoid users and corresponding identification codes

**Table S4.** List of recognized indications of glucocorticoid therapy and corresponding identification codes

**Table S5.** List of therapeutic measures associated with the prescription of glucocorticoids and corresponding identification codes

**Figure S1.** Trends in prevalence of oral glucocorticoid use in France per year from 2007 to 2014 by products. A) Prevalence estimates with 95%CI (error bars) and B) relative changes in reference to year 2007

**Figure S2.** Trends in prevalence of oral glucocorticoid (GC) use in France per year from 2007 to 2014, in women (A) and men (B) according to age. Prevalence estimates with 95% CIs (error bars)

**Table S1. List of glucocorticoids and corresponding identification codes**

| Glucocorticoids    | Source                   | Code    |
|--------------------|--------------------------|---------|
| Betamethasone      | Drug reimbursement (ATC) | H02AB01 |
| Dexamethasone      | Drug reimbursement (ATC) | H02AB02 |
| Methylprednisolone | Drug reimbursement (ATC) | H02AB04 |
| Prednisolone       | Drug reimbursement (ATC) | H02AB06 |
| Prednisone         | Drug reimbursement (ATC) | H02AB07 |

ATC: Anatomical Therapeutic Chemical classification system

**Table S2. List of concurrent drugs reimbursed at index date and corresponding identification codes**

| Concurrent drugs at index date | Source                   | Code                         |
|--------------------------------|--------------------------|------------------------------|
| Analgesics                     | Drug reimbursement (ATC) | N02                          |
| Antibiotics                    | Drug reimbursement (ATC) | J01                          |
| Anti-inflammatory              | Drug reimbursement (ATC) | M01, M02                     |
| Respiratory/otological drugs   | Drug reimbursement (ATC) | R01, R02, R05, R06, S01, S02 |

ATC: Anatomical Therapeutic Chemical classification system

**Table S3. List of comorbidities at risk for glucocorticoid users and corresponding identification codes**

| Comorbidities       | Source                                                                              | Code                                                                              |
|---------------------|-------------------------------------------------------------------------------------|-----------------------------------------------------------------------------------|
| Diabetes            | Hospital discharge summary or ALD registration (ICD-10)<br>Drug reimbursement (ATC) | E10-E14<br>A10                                                                    |
| Osteoporosis        | Hospital discharge summary (ICD-10)<br>Drug reimbursement (ATC)                     | M80-M81, M83-M85<br>M05BA, M05BB, M05BX04,<br>M05BX03, G03XC01, H05BA,<br>H05AA02 |
| Psychotic disorders | Hospital discharge summary or ALD registration (ICD-10)<br>Drug reimbursement (ATC) | F20-F29<br>N05A (N05AN excluded)                                                  |

ALD: *Affection de Longue Durée* (chronic disease); ATC: Anatomical Therapeutic Chemical classification system; ICD-10: International Classification of Diseases 10<sup>th</sup> revision

**Table S4. List of recognized indications of glucocorticoid therapy and corresponding identification codes**

| Indications                    | Sources                                                                                                             | Codes                                                                                                                                                                                                                                                                             |
|--------------------------------|---------------------------------------------------------------------------------------------------------------------|-----------------------------------------------------------------------------------------------------------------------------------------------------------------------------------------------------------------------------------------------------------------------------------|
| Cancer                         | Hospital discharge summary or ALD registration (ICD-10)<br>Drug reimbursement (ATC)                                 | C00-C97, D00-D09, D37-D48<br>L01, L02                                                                                                                                                                                                                                             |
| Inflammatory bowel diseases    | Hospital discharge summary or ALD registration (ICD-10)<br>Drug reimbursement (ATC)<br><br>Drug reimbursement (CIP) | K50, K51<br>A07EA04, A07EC02,<br>A07EC03, A07EC01,<br>A07EA02, L04AB04,<br>L04AB06, L04AC05,<br>L04AX01<br>3425409 <sup>a</sup>                                                                                                                                                   |
| Multiple sclerosis             | Hospital discharge summary or ALD registration (ICD-10)<br>Drug reimbursement (ATC)                                 | G35<br>L03AB07, L03AB08,<br>L03AB13, L03AX13,<br>L04AA27, N07XX07,<br>N07XX09, L04AA31                                                                                                                                                                                            |
| Obstructive pulmonary diseases | Hospital discharge summary or ALD registration (ICD-10)<br>Drug reimbursement (ATC)                                 | J44-J46, J96<br>R03                                                                                                                                                                                                                                                               |
| Rheumatic diseases             | Hospital discharge summary or ALD registration (ICD-10)<br>Drug reimbursement (ATC)<br><br>Drug reimbursement (CIP) | M05, M06, M08, M30-M35,<br>M45, M46<br>L04AA13, L04AA24,<br>L04AB04, L04AB06,<br>L04AB01, L04AB05,<br>L04AC03, L04AC08,<br>L04AC07, L04AD01,<br>L04AX01, L04AX03,<br>L01BA01 <sup>b</sup> , L01AA01,<br>A07EC01, P01BA01,<br>P01BA02, M01CB05,<br>M01CC01<br>3293907 <sup>c</sup> |

ALD: *Affection de Longue Durée* (chronic disease); ATC: Anatomical Therapeutic Chemical classification system; CIP: *Code d'identification de la présentation* (French nomenclature, unique identification code for each presentation of a proprietary medicinal product); ICD-10: International Classification of Diseases 10<sup>th</sup> revision

<sup>a</sup> No ATC code for para aminosalicylic acid labeled for inflammatory bowel diseases; it was identified using CIP code

<sup>b</sup> The pharmaceutical forms of methotrexate labeled for oncology, identified using CIP codes (3150125, 3150148, 3160218), were excluded

<sup>c</sup> No ATC code for tiopronine labeled for rheumatoid arthritis; it was identified using CIP code (3293907)

**Table S5. List of therapeutic measures associated with the prescription of glucocorticoids and corresponding identification codes**

| Therapeutic measures                             | Sources                                                 | Codes                                                                                                        |
|--------------------------------------------------|---------------------------------------------------------|--------------------------------------------------------------------------------------------------------------|
| <i>Prevention/management of osteoporosis</i>     |                                                         |                                                                                                              |
| Dual-energy X-ray absorptiometry, DXA            | Hospital discharge summary or ambulatory setting (CCAM) | PAQK007                                                                                                      |
| Drugs for osteoporosis management                | Drug reimbursement (ATC)                                | M80-M81, M83-M85<br>M05BA, M05BB,<br>M05BX04, M05BX03,<br>G03XC01, H05BA,<br>H05AA02, A12AX,<br>A12AA, A11CC |
| <i>Potassium supplementation</i>                 |                                                         |                                                                                                              |
| Potassium supplements                            | Drug reimbursement (ATC)                                | A12B                                                                                                         |
| Serum potassium assay                            | Lab test, ambulatory setting (TNB)                      | 1608, 1609, 1610                                                                                             |
| <i>Ulcer prophylaxis</i>                         |                                                         |                                                                                                              |
| Proton pump inhibitors                           | Drug reimbursement (ATC)                                | A02BC                                                                                                        |
| Non-steroidal anti-inflammatory                  | Drug reimbursement (ATC)                                | M01A                                                                                                         |
| Aspirin labeled for anti-inflammatory properties | Drug reimbursement (ATC)                                | N02BA01, N02BA51                                                                                             |

ALD: *Affection de Longue Durée* (chronic disease); ATC: Anatomical Therapeutic Chemical classification system; CCAM: *Classification Commune des Actes Médicaux* (French medical classification for clinical procedures); TNB: *Table Nationale de Biologie* (French medical classification for lab tests)

### A) Prevalence estimates

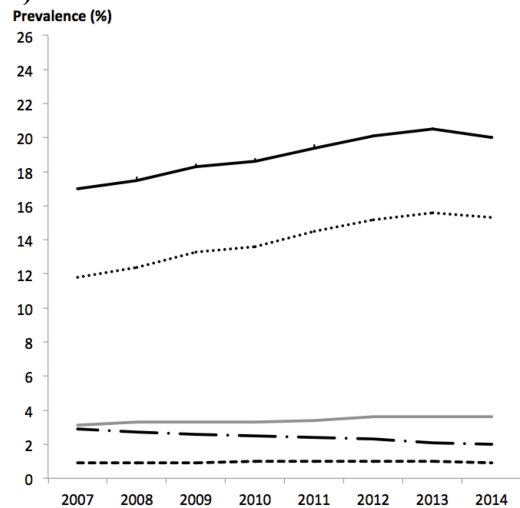

### B) Relative changes

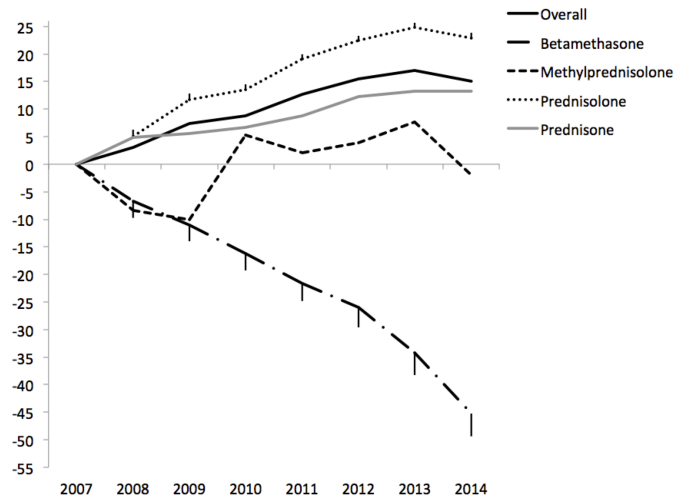

**Figure S1. Trends in prevalence of oral glucocorticoid use in France per year from 2007 to 2014 by products. A) Prevalence estimates with 95%CI (error bars) and B) relative changes in reference to year 2007**

### A) Prevalence of GC use in women by age

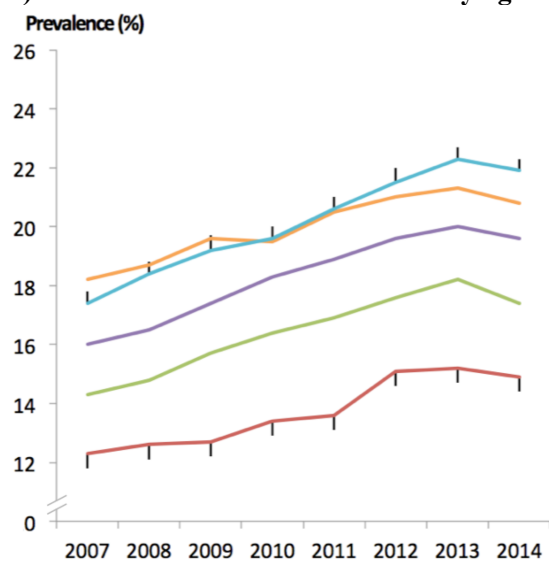

### B) Prevalence of GC use in men by age

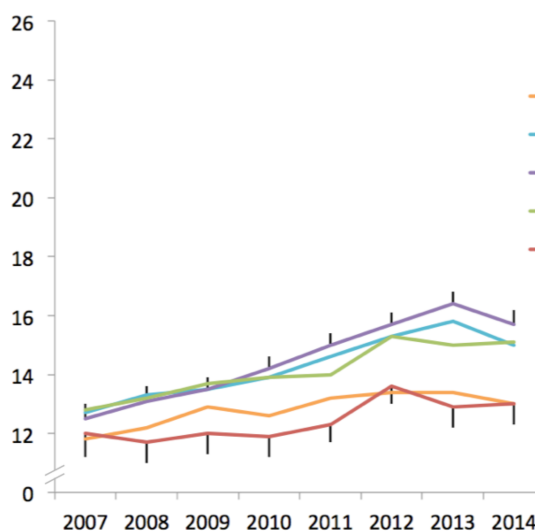

**Figure S2. Trends in prevalence of oral glucocorticoid (GC) use in France per year from 2007 to 2014, in women (A) and men (B) according to age. Prevalence estimates with 95% CIs (error bars)**
